# Supplementary material for: Adaptation and validation of a German version of the Multimorbidity Treatment Burden Questionnaire
Source: Springer Nature journal article supplement (doi:10.1186/s12955-022-01993-z), 2022-06-03

**Additional file 2**

**Figure 1** Scree plot for German MTBQ

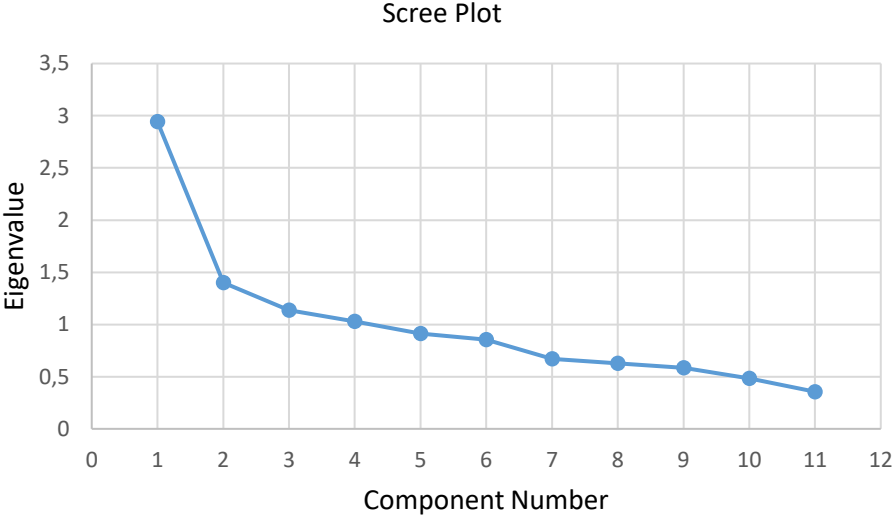

Supplement: MOESM2 [file 23125394]
